# Supplementary material
Source: PubMed Central journal article supplement (PMC7302768)
Supplement: mmc1.pdf [file mmc1.pdf]

# THE LANCET Microbe

## Supplementary appendix

This appendix formed part of the original submission and has been peer reviewed. We post it as supplied by the authors.

Supplement to: Santini J M, Edwards S J L. Host range of SARS-CoV-2 and implications for public health. *Lancet Microbe* 2020; published online June 18. [https://doi.org/10.1016/S2666-5247\(20\)30069-0](https://doi.org/10.1016/S2666-5247(20)30069-0).

**Appendix 1** – Published experimental studies listed according to type and quality of methods and species identified

| Article                     | Animals tested                                                                                                                       | Source and quality of data                                                                                                                                                                                                                       | Results                                                                                                                          |
|-----------------------------|--------------------------------------------------------------------------------------------------------------------------------------|--------------------------------------------------------------------------------------------------------------------------------------------------------------------------------------------------------------------------------------------------|----------------------------------------------------------------------------------------------------------------------------------|
| Deng et al. <sup>7</sup>    | This paper tested many animals including wild, companion and farm – too many to list – chicken, duck, mouse, rat and pig <i>etc.</i> | Experimental<br><br><i>in vivo</i> (direct infection) and antibody used for sole method of detection presumably missing asymptomatic cases.<br><br>No metadata provided including information on the numbers of animals tested, ages <i>etc.</i> | All were negative                                                                                                                |
| Kim et al. <sup>2</sup>     | Ferrets                                                                                                                              | Experimental.<br><br><i>in vivo</i> (direct infection) and RT-PCR used for detecting CoV-2                                                                                                                                                       | Showed infection and transmission of virus between infected and not infected animals (transmission not requiring direct contact) |
| Munster et al. <sup>6</sup> | Macaques                                                                                                                             | Experimental<br><br><i>in vivo</i> (direct infection) and RT-PCR used for detecting CoV-2                                                                                                                                                        | Showed infection and possibility for transmission (no direct evidence of transmission)                                           |
| Rockx et al. <sup>3</sup>   | Macaques                                                                                                                             | Experimental<br><br><i>in vivo</i> (direct infection) and RT-PCR used for detecting CoV-2                                                                                                                                                        | Showed infection and possibility for transmission (no direct evidence of transmission)                                           |

|                          |                                     |                                                                                                                 |                                                                                                                                                                                                                                                                                                       |
|--------------------------|-------------------------------------|-----------------------------------------------------------------------------------------------------------------|-------------------------------------------------------------------------------------------------------------------------------------------------------------------------------------------------------------------------------------------------------------------------------------------------------|
| Shi et al. <sup>4</sup>  | Dogs, cats, ferrets, pigs, chickens | Experimental<br><br><i>in vivo</i> (direct infection) and RT-PCR and use of antibodies used for detecting CoV-2 | Infection of cats and ferrets. Respiratory droplet transmission detected in cats. Ferrets show clinical signs of infection.<br><br>Virus detected in faecal samples of some of the dogs but say they are not infectious but unclear how this was determined. CoV-2 not detected in pigs and chickens. |
| Sia et al. <sup>5</sup>  | Golden hamster                      | Experimental<br><br><i>in vivo</i> (direct infection)                                                           | Infection of golden hamsters                                                                                                                                                                                                                                                                          |
| Zhou et al. <sup>1</sup> | Horseshoe bat, civet, pig and mouse | Experimental<br><br><i>in vitro</i> – protein-protein interaction of CoV-2 spike protein and ACE2               | Yes to interaction between CoV-2 spike protein-ACE2 from horseshoe bat, civet and pig<br><br>No interaction with mouse ACE2                                                                                                                                                                           |

Gu H., Chen Q., Yang G. et al. Rapid adaptation of SARS-CoV-2 in BALB/c mice: Novel mouse model for vaccine efficacy <https://doi.org/10.1101/2020.05.02.073411> downloaded 16th May 2020

**Appendix 2 – Published modelling studies listed according to type and quality of methods and species identified**

| Article                   | Animals tested                                                                                                                                                                                                                                                 | Source and quality of data                                                                                                                                                                         | Results                                                                                                                                                                                                                                                                                                                                                                                |
|---------------------------|----------------------------------------------------------------------------------------------------------------------------------------------------------------------------------------------------------------------------------------------------------------|----------------------------------------------------------------------------------------------------------------------------------------------------------------------------------------------------|----------------------------------------------------------------------------------------------------------------------------------------------------------------------------------------------------------------------------------------------------------------------------------------------------------------------------------------------------------------------------------------|
| Luan et al. <sup>8</sup>  | Many animals including: apes, monkeys, cat, dog/wolf, hamster, squirrel, sheep, cows, horses, stoat, civet, wild boar, polecat, pangolin, rabbit, camel, racoon, bats, mouse, rat, platypus, racoon dog, elephant, hedgehog, meerkat, kangaroo rat, guinea pig | <i>in silico</i> modelling – based on just 5 amino acids involved in binding CoV-2 spike protein and ACE2 receptor.<br><br>Unclear how cut-off was determined – see differences for horseshoe bats | Yes for possible binding apes, monkeys, cat, dog/wolf, hamster, squirrel, sheep, cattle, horses, stoat, civet, wild boar, polecat, pangolin, rabbit, camel, racoon<br><br>Some bats and not others – yes to hairy-eared horseshoe bat no to greater horseshoe bat. Explanation not given. No – mouse, rat, platypus, racoon dog, elephant, hedgehog, meerkat, kangaroo rat, guinea pig |
| Wan et al. <sup>9</sup>   | Ape, bat, civet, mouse, rat, pig, ferret, monkey, cat                                                                                                                                                                                                          | <i>in silico</i> modelling based on 5 amino acid residues at interface between CoV-2 spike protein and ACE2 receptor                                                                               | Likely interaction - ape, bat, civet, pig, ferret, monkey, cat<br><br>Less likely interaction – rat, mouse                                                                                                                                                                                                                                                                             |
| Zhai et al. <sup>10</sup> | Chicken, duck, guinea pig, Syrian hamster, pig, horseshoe bat, civet, mouse, dog, cat, tiger, lion, ferret, cow, sheep, camel                                                                                                                                  | <i>In silico</i> modelling of receptor binding domain of spike to ACE2 protein of different animals                                                                                                | Detailed study of interacting residues in the interface and differences in the different animals but no predictions are made for the likelihood of infections                                                                                                                                                                                                                          |
